# Supplementary material for: Studies of simultaneous electrochemical sensing of Hg2+and Cd2+ions and catalytic reduction properties of 4-nitrophenol by CuO, Au, and CuO@Au composite nanoparticles synthesised using a graft copolymer as a bio-template
Source: Royal Society of Chemistry journal article supplement (doi:10.1039/d1nj04702g), 2021-01-01
Supplement: d1nj04702g1.pdf [file d1nj04702g1.pdf]

1 **Electronic Supplementary Material (ESI) for New Journal of Chemistry. This journal is ©**  
2 **The Royal Society of Chemistry and the Centre National de la Recherche Scientifique 2021**

3

4

## **SUPPORTING INFORMATION**

5 **Studies of simultaneous electrochemical sensing of Hg<sup>2+</sup> and Cd<sup>2+</sup>**

6 **ions and catalytic reduction properties of 4-nitrophenol by CuO,**

7 **Au, CuO@Au composite nanoparticles, synthesised using a graft**

8

## **copolymer as a bio template**

9 **Rakesh Kumar Saren<sup>1</sup>, Shankha Banerjee<sup>2</sup>, Barun Mondal<sup>1</sup>, Sanjib Senapati<sup>2</sup> and Tridib**

10 **Tripathy<sup>1\*</sup>**

11 **<sup>1</sup>Postgraduate Division of Chemistry, Midnapore College (Autonomous), Midnapore,**  
12 **Paschim Medinipur, 721101, West Bengal, India.**

13 **<sup>2</sup>Department of Biotechnology, BJM School of Bioscience, Indian Institute of Technology**  
14 **Madras, Chennai 600036, India.**

15

16

17

18 **\*Corresponding author**

19 E-mail: [tridib.tripathy@midnaporecollege.ac.in](mailto:tridib.tripathy@midnaporecollege.ac.in), [tridib\\_tripathy@yahoo.co.in](mailto:tridib_tripathy@yahoo.co.in)

20 Tel/Fax: +913222275847

21

22

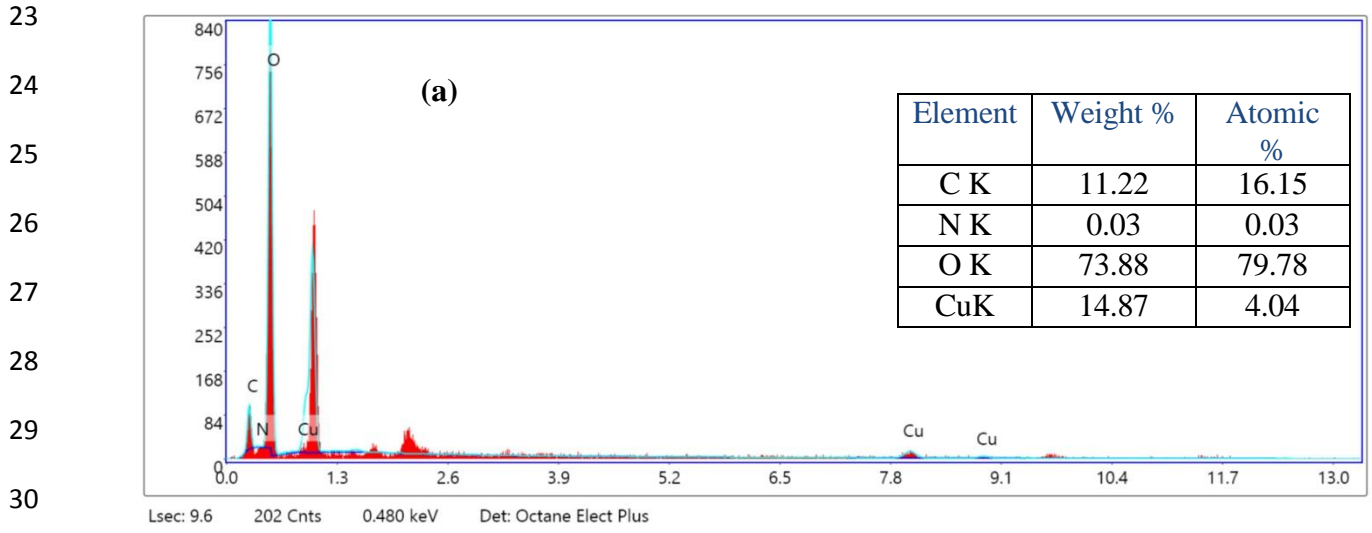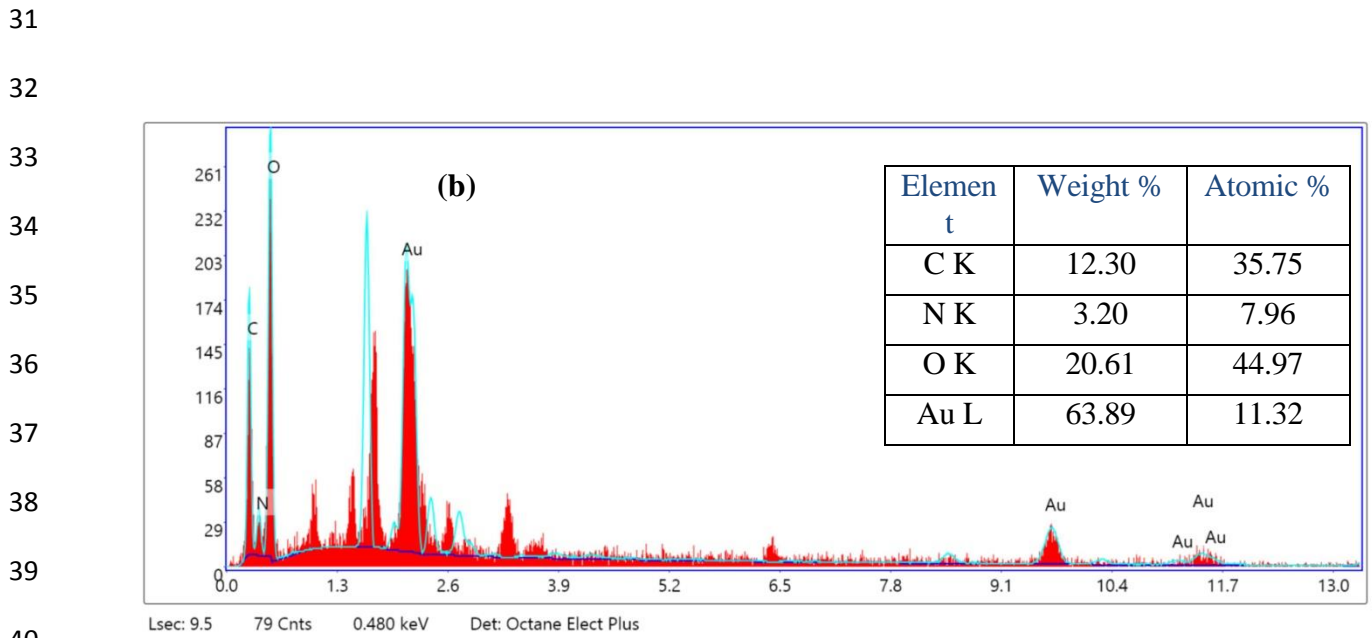

41

42 **Fig. S1.** (a) EDAX analysis of SAGAMA-CuO NPs (b) SAGAMA-Au NPs.

43

44

45

46

47

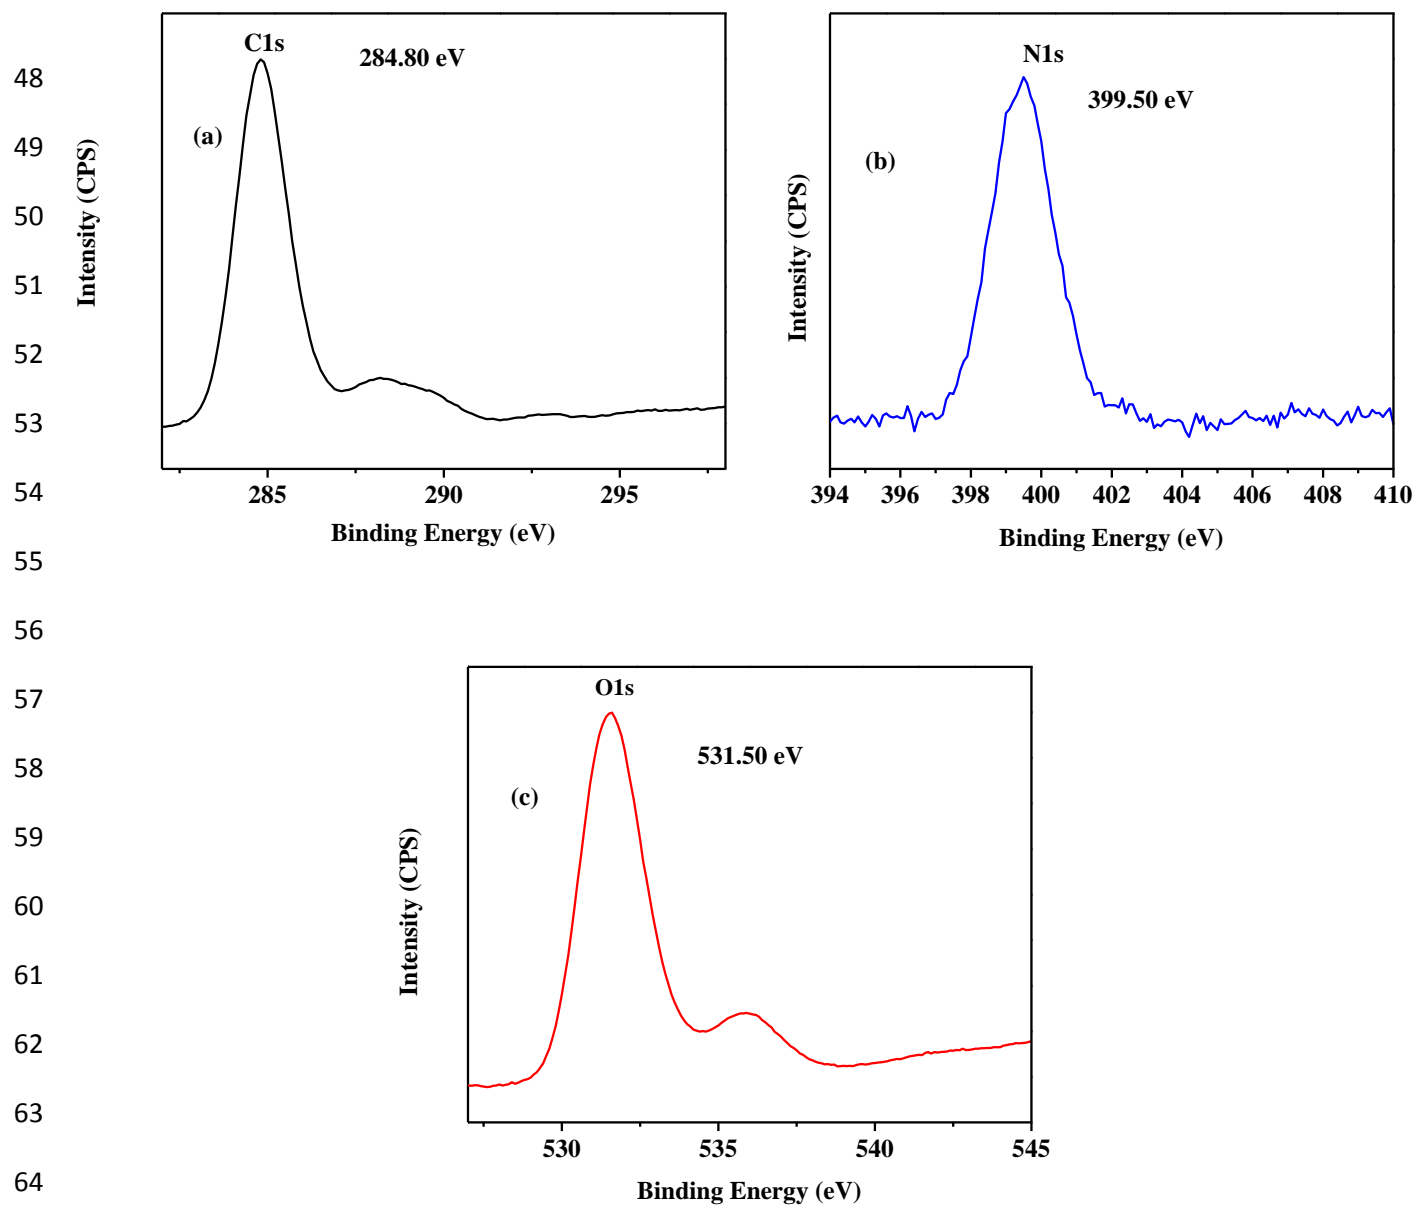

67 **Fig. S2.** XPS analysis of (a) C1s (b) N1s (c) O1s at SAGAMA-CuO@Au NPs

73  
74  
75  
76  
77  
78  
79  
80  
81  
82  
83  
84  
85  
86  
87  
88  
89  
90  
91  
92  
93  
94  
95  
96  
97

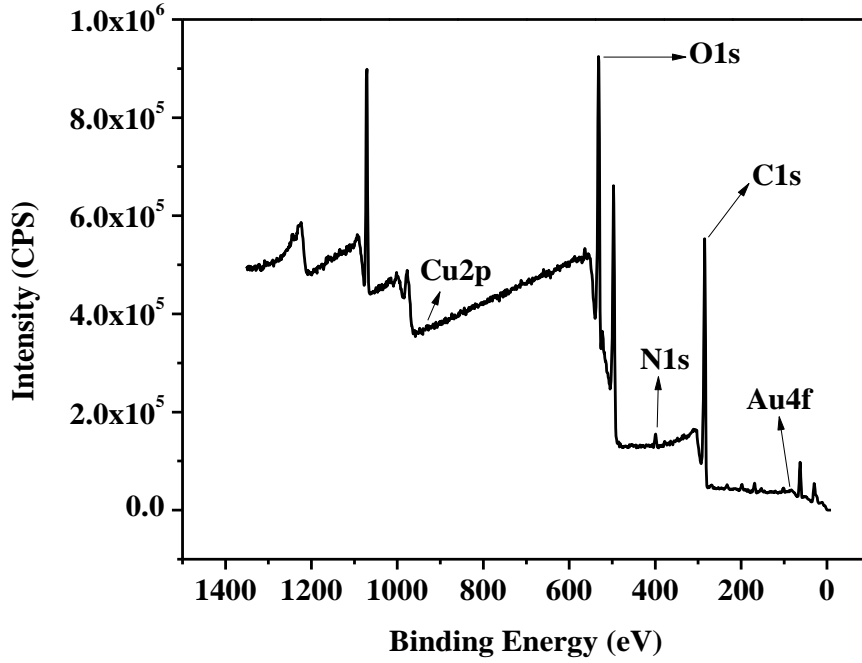

**Fig. S3.** Full range XPS spectra of SAGAMA-CuO@Au NPs

98  
99  
100  
101  
102  
103  
104  
105  
106  
107  
108  
109  
110  
111  
112  
113  
114  
115  
116  
117  
118  
119  
120  
121  
122

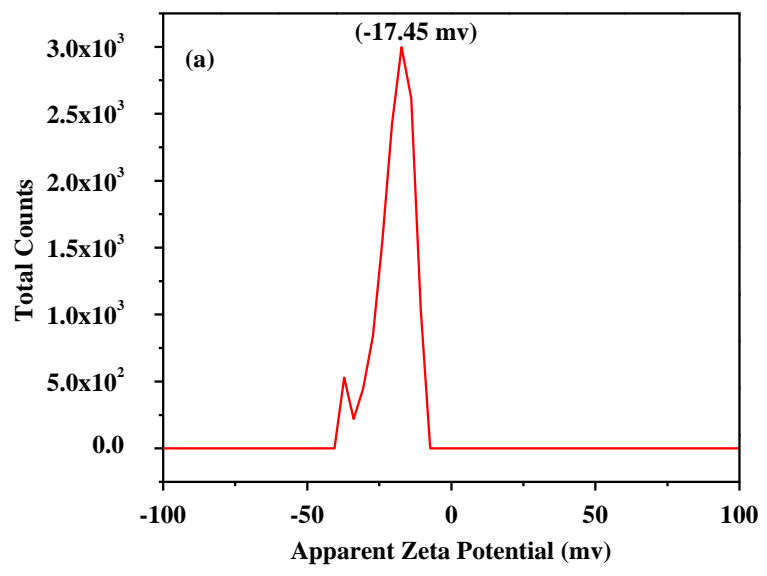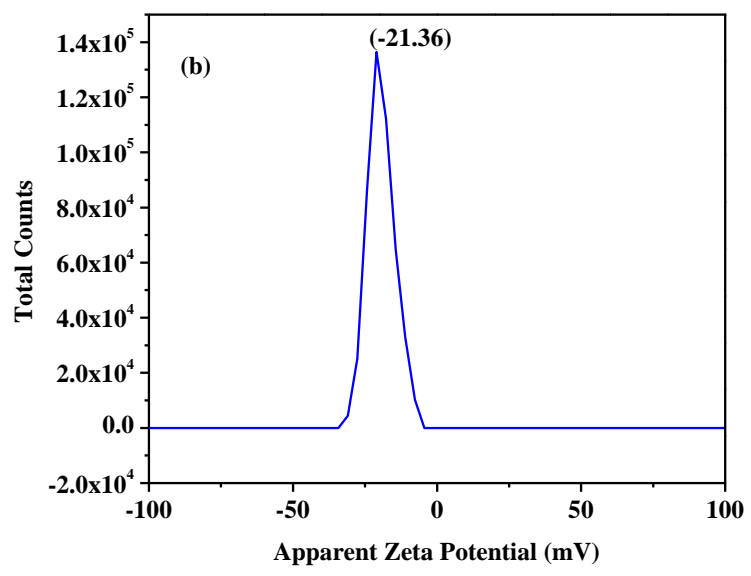

**Fig. S4.** Zeta potential values of (a) SAGAMA-CuO NPs (b) SAGAMA-Au NPs.

123  
124  
125  
126  
127  
128  
129  
130  
131  
132  
133  
134  
135  
136  
137  
138  
139  
140  
141  
142  
143  
144  
145  
146  
147

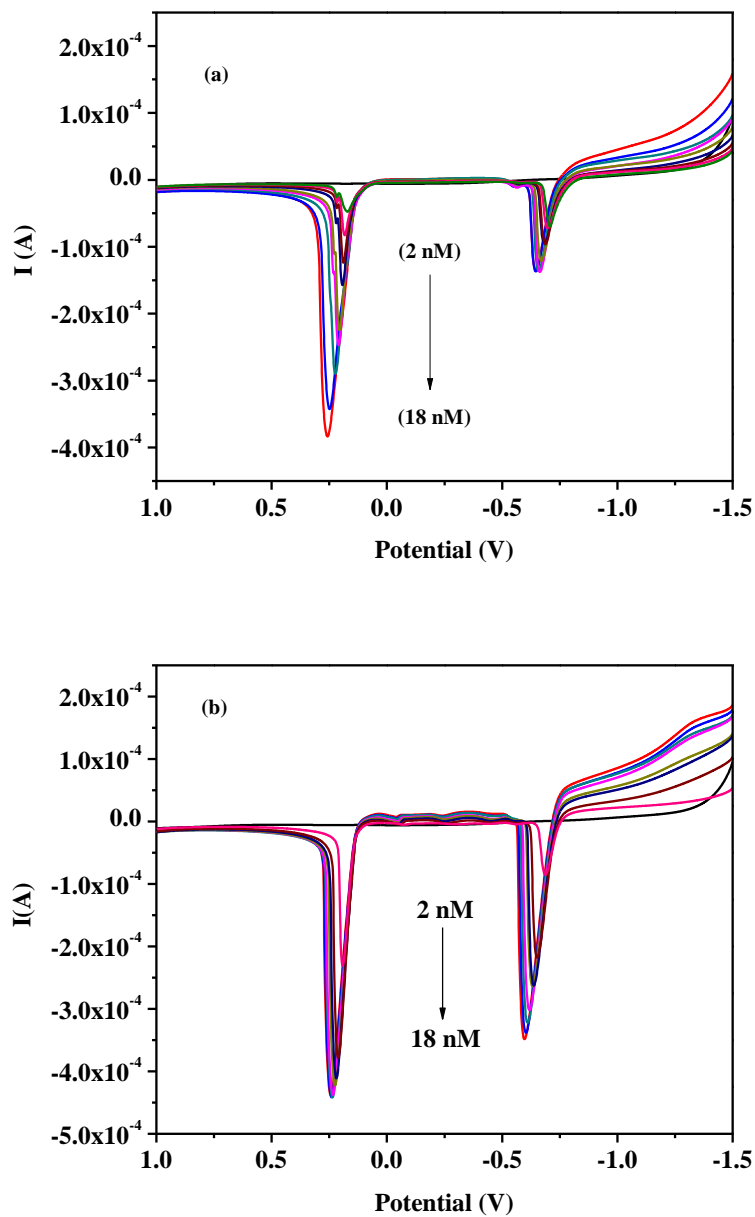

**Fig. S5.** LSV analysis of (a) SAGAMA-CuO NPs/GCE and (b) SAGAMA-Au NPs/GCE with different concentration of equimolar mixture (2 to 16 nM) of  $\text{Hg}^{2+}$  and  $\text{Cd}^{2+}$  ions.

148  
149  
150  
151  
152  
153  
154  
155  
156  
157  
158  
159  
160  
161  
162  
163  
164  
165  
166  
167  
168  
169  
170  
171  
172

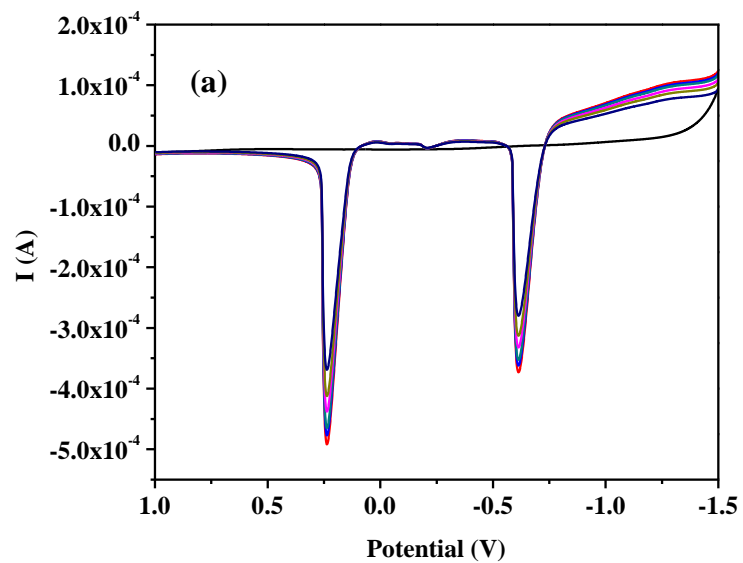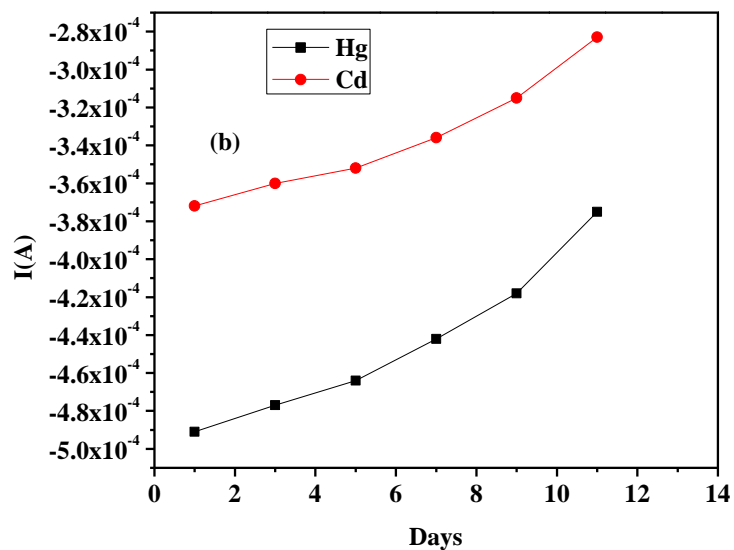

**Fig. S6** (a) LSV plot of stability test (b) Calibration curve of cathodic peak current  $I$  (A) vs. days

173  
174  
175  
176  
177  
178  
179  
180  
181  
182  
183  
184  
185  
186  
187  
188  
189  
190  
191  
192  
193  
194  
195  
196  
197

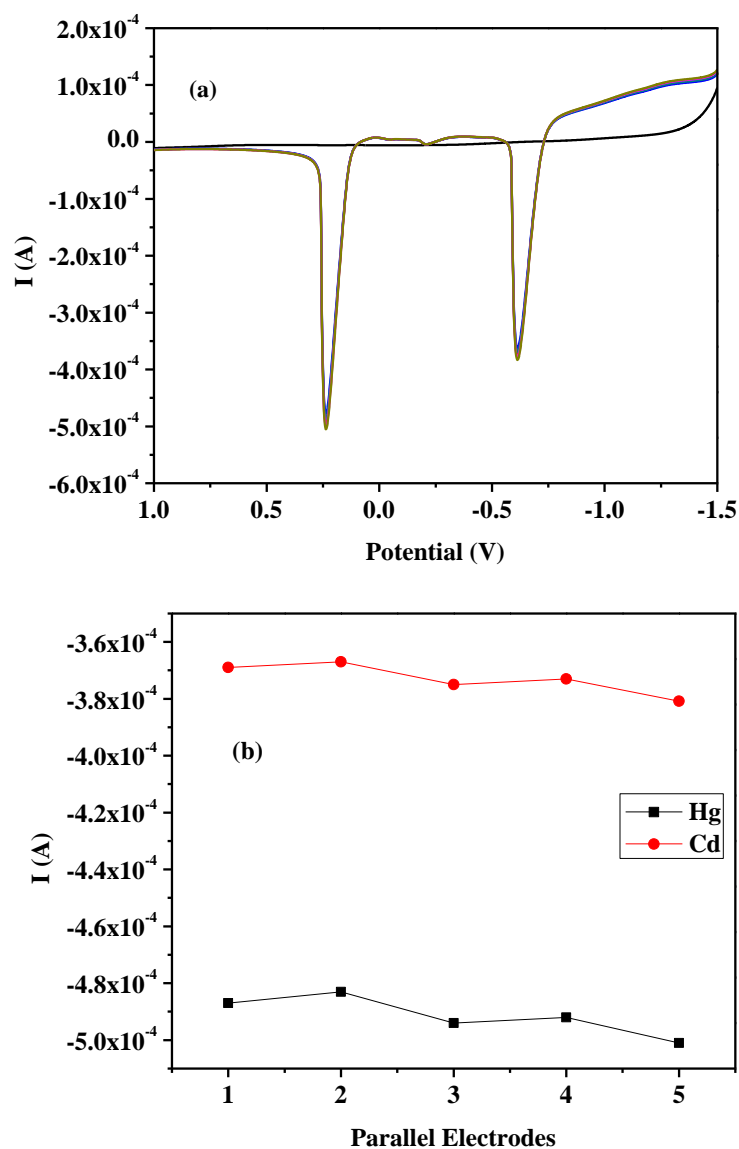

**Fig. S7** (a) LSV plot of reproducibility test at SAGAMA-CuO@ Au NPS/GCE (b) Calibration curve of cathodic peak current I (A) vs parallel electrodes.



198

199

200

201

202

203

204

205

206

207

208

209

210

211

212

213

214

215

216

217

218

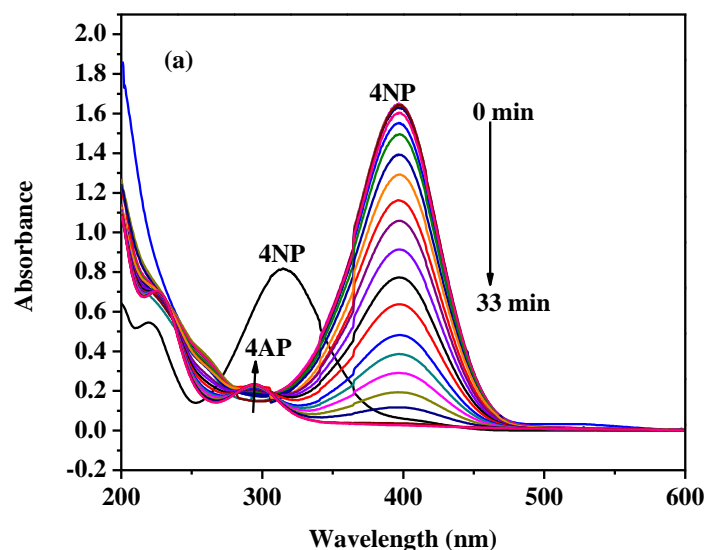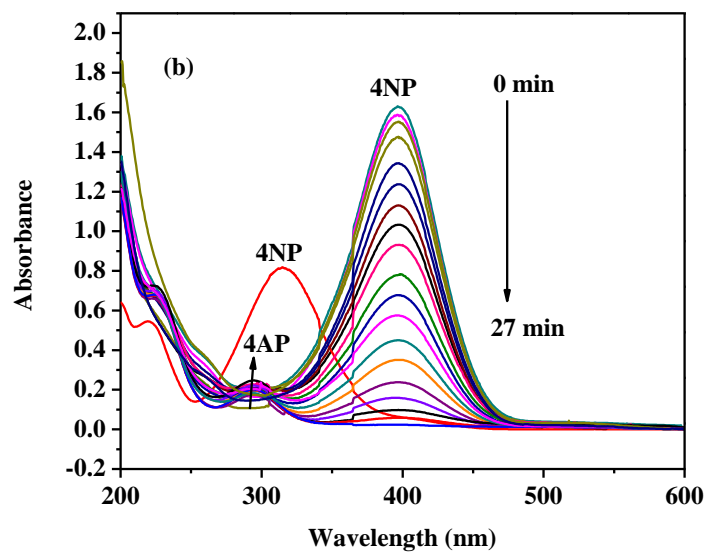

219 **Fig. S8** (a) UV-visible spectra of SAGAMA-CuO NPs (1.17 mg ml<sup>-1</sup>) for catalytic reduction of  
220 4NP into 4AP in aqueous medium in presence of 0.002 mg ml<sup>-1</sup> 4NP and 10mM NaBH<sub>4</sub>. (b)  
221 UV-visible spectra of SAGAMA-Au NPs (1.17 mg ml<sup>-1</sup>) for catalytic reduction of 4NP into 4AP  
222 in aqueous medium in presence of 0.002 mg ml<sup>-1</sup> 4NP and 10mM NaBH<sub>4</sub>.

223

224  
225  
226  
227  
228  
229  
230  
231  
232  
233  
234  
235  
236  
237  
238  
239  
240  
241  
242  
243  
244  
245  
246  
247  
248  
249

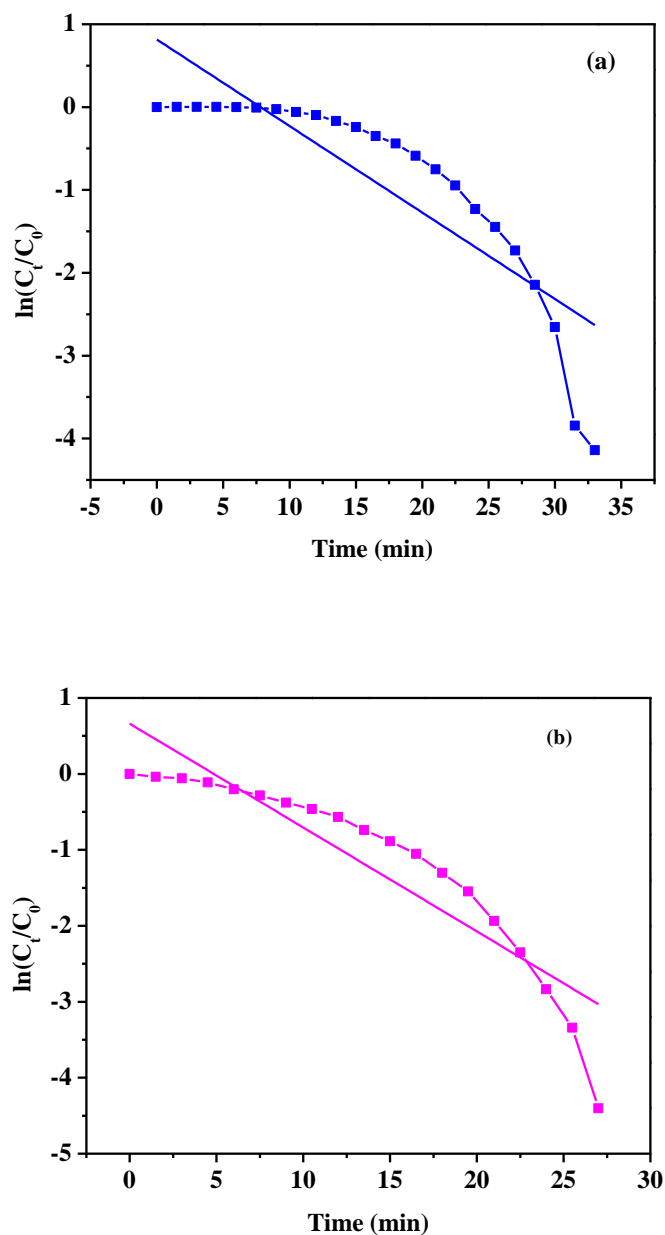

**Fig. S9** (a) Plot of  $\ln(C_t/C_0)$  vs. time for catalytic reduction of 4NP ( $0.002 \text{ mg ml}^{-1}$ ) into 4Ap in aqueous medium in presence of  $1.17 \text{ mg ml}^{-1}$  SAGAMA-CuO NPs with  $10 \text{ mM NaBH}_4$ . (b) Plot of  $\ln(C_t/C_0)$  vs. time for catalytic reduction of 4NP ( $0.002 \text{ mg ml}^{-1}$ ) into 4Ap in aqueous medium in presence of  $1.17 \text{ mg ml}^{-1}$  SAGAMA-Au NPs with  $10 \text{ mM NaBH}_4$ .
